# Supplementary material for: The Impact of Metal-Based Nanoparticles Produced by Different Types of Underwater Welding on Marine Microalgae
Source: MDPI journal article supplement (doi:10.3390/toxics11020105), 2023-01-22
Supplement: s1 [file s1]

# Supplementary Materials: The Impact of Metal-Based Nanoparticles Produced by Different Types of Underwater Welding on Marine Microalgae

Pukula, Konstantin Kirichenko, Vladimir Chernousov, Sergey Parshin, Alexander Masyutin, Yulia Parshina, Anton Pogodaev, Alexander Gridasov, Aristidis Tsatsakis and Kirill Golokhvast

**Table S1.** Results of ICP-MS analysis of two welding suspensions in seawater.

| Chemical Species | Concentration in Suspension, µg/L |         |         |
|------------------|-----------------------------------|---------|---------|
|                  | Control                           | ELD     | WR      |
| <sup>7</sup> Li  | 140                               | 144     | 150     |
| <sup>9</sup> Be  | 0                                 | ≤ 0,057 | ≤ 0,057 |
| <sup>11</sup> B  | 4849                              | 4815    | 5944    |
| <sup>23</sup> Na | 9398281                           | 9020554 | 9773710 |
| <sup>24</sup> Mg | 1166314                           | 1119792 | 1181197 |
| <sup>27</sup> Al | 92                                | 487     | 492     |
| <sup>28</sup> Si | 16578                             | ≤ 16000 | 28697   |
| <sup>31</sup> P  | 123                               | 86      | 145     |
| <sup>34</sup> S  | 562796                            | 533411  | 559774  |
| <sup>39</sup> K  | 359836                            | 346340  | 368331  |
| <sup>44</sup> Ca | 457236                            | 434272  | 454397  |
| <sup>45</sup> Sc | 0                                 | 0       | 0       |
| <sup>47</sup> Ti | 2                                 | 778     | 788     |
| <sup>51</sup> V  | 2                                 | 4       | 5       |
| <sup>52</sup> Cr | 2                                 | 5       | 6       |
| <sup>55</sup> Mn | 7                                 | 291     | 294     |
| <sup>56</sup> Fe | 99                                | 5671    | 5813    |
| <sup>59</sup> Co | 1                                 | 1       | 1       |
| <sup>60</sup> Ni | 6                                 | 8       | 9       |
| <sup>63</sup> Cu | 59                                | 71      | 67      |
| <sup>66</sup> Zn | 33                                | 538     | 519     |
| <sup>71</sup> Ga | 0                                 | 0       | 0       |
| <sup>72</sup> Ge | 0                                 | 0       | 1       |
| <sup>75</sup> As | 2                                 | 2       | 2       |
| <sup>78</sup> Se | 1                                 | 1       | 0       |

|                   |           |        |      |
|-------------------|-----------|--------|------|
| <sup>85</sup> Rb  | 97        | 101    | 95   |
| <sup>88</sup> Sr  | 7304      | 7418   | 7141 |
| <sup>89</sup> Y   | 0         | 0      | 0    |
| <sup>90</sup> Zr  | 0         | 6      | 5    |
| <sup>93</sup> Nb  | 0         | 3      | 3    |
| <sup>98</sup> Mo  | 11        | 12     | 11   |
| <sup>107</sup> Ag | 0         | 0      | 0    |
| <sup>114</sup> Cd | 0         | 2      | 2    |
| <sup>118</sup> Sn | 1         | 5      | 4    |
| <sup>121</sup> Sb | 1         | 1      | 1    |
| <sup>125</sup> Te | ≤ 0,19    | ≤ 0,19 | 0    |
| <sup>133</sup> Cs | 0         | 0      | 0    |
| <sup>137</sup> Ba | 9         | 17     | 16   |
| <sup>139</sup> La | 0         | 0      | 0    |
| <sup>140</sup> Ce | 0         | 0      | 0    |
| <sup>141</sup> Pr | 0         | 0      | 0    |
| <sup>146</sup> Nd | 0         | 0      | 0    |
| <sup>147</sup> Sm | 0         | 0      | 0    |
| <sup>151</sup> Eu | 0         | 0      | 0    |
| <sup>157</sup> Gd | 0         | 0      | 0    |
| <sup>159</sup> Tb | 0         | 0      | 0    |
| <sup>163</sup> Dy | 0         | 0      | 0    |
| <sup>165</sup> Ho | 0         | 0      | 0    |
| <sup>166</sup> Er | 0         | 0      | 0    |
| <sup>169</sup> Tm | ≤ 0,00044 | 0      | 0    |
| <sup>172</sup> Yb | ≤ 0,0022  | 0      | 0    |
| <sup>175</sup> Lu | 0         | 0      | 0    |
| <sup>178</sup> Hf | 0         | 0      | 0    |
| <sup>181</sup> Ta | ≤ 0,027   | 0      | 0    |
| <sup>184</sup> W  | 0         | 1      | 1    |
| <sup>187</sup> Re | 0         | 0      | 0    |
| <sup>205</sup> Tl | 0         | 0      | 0    |
| <sup>208</sup> Pb | 1         | 4      | 3    |
| <sup>209</sup> Bi | 0         | 0      | 0    |
| <sup>232</sup> Th | 0         | 0      | 0    |

|                  |   |   |   |
|------------------|---|---|---|
| <sup>238</sup> U | 3 | 3 | 3 |
|------------------|---|---|---|
